# Supplementary material
Source: HighWire-hosted journal article supplement (https://n.neurology.org/content/suppl/2017/05/01/65.5.668)
Supplement: NEUROLOGY2016000007.pdf [file NEUROLOGY2016000007.pdf]

# Uso de prolactina sérica en el diagnóstico de crisis convulsivas

Reporte del subcomité de evaluación terapéutica y tecnológica de la Academia Americana de Neurología

David K. Chen, MD  
Yuen T. So, MD, PhD  
Robert S. Fisher, MD,  
PhD

## RESUMEN

**Objetivo:** El propósito de este artículo es la revisión del uso de prolactina sérica en el diagnóstico de crisis convulsivas. **Métodos.** Los autores identificaron estudios relevantes en bases de datos múltiples y listas de referencia. Se resumieron los estudios que cumplieron con los criterios de inclusión y se evaluaron a partir de la calidad de la evidencia. Se analizaron los resultados y se reunieron cuando fue apropiado. **Resultados.** La mayoría de los estudios emplearon prolactina sérica a un nivel tan anormal como dos veces el valor de la línea basal. Para diferenciar las crisis convulsivas de las psicogénicas no epilépticas, un estudio de clase I y 7 clase II mostraron que la prolactina sérica elevada fue altamente predictiva de crisis generalizadas tónico clónicas (CGTC) y parciales complejas. La sensibilidad acumulada fue más elevada en las CGTC (60.0%) que en las parciales complejas (46.1%), mientras que la específica fue similar en los dos casos (96%). Los datos para establecer la validez para crisis parciales simples no fueron suficientes. Dos estudios clase II fueron consistentes en mostrar elevación de prolactina sérica después de un síncope inducido para prueba de inclinación. Existen datos poco concluyentes en cuanto al valor de la prolactina sérica en el estado epiléptico, crisis repetitivas y crisis en neonatos. **Recomendaciones.** Cuando el ensayo de prolactina sérica se mide en el ámbito clínico apropiado unos 10-20 minutos después del evento sospechado, es un agregado útil para diferenciar entre CGTN o parciales complejas y crisis psicogénicas no epilépticas en adultos y niños mayores (nivel B). El ensayo de prolactina sérica no distingue crisis convulsivas de síncope (nivel B). El ensayo de uso de prolactina sérica no ha sido establecido en la evaluación del estado epiléptico, las crisis repetitivas y las crisis en neonatos (nivel U). *Neurology*® 2005;65:668-675

La descarga de prolactina (PRL) de la glándula pituitaria se controla por el hipotálamo a través del factor inhibitorio de PRL, que ahora se cree es dopamina.<sup>1</sup> Existe una hipótesis según la cual la actividad epiléptica ictal en las estructuras temporales mesiales puede propagarse hasta el hipotálamo, cambiando la regulación hipotalámica de la descarga de PRL.<sup>2</sup>

Trimble fue el primero en demostrar que las crisis generalizadas tónico clónicas (CGTC), pero no las crisis psicogénicas no epilépticas (CPNE) pueden elevar la PRL sérica.<sup>3</sup> A pesar de los datos confirmatorios subsecuentes, la sensibilidad y especificidad del ensayo de PRL sérica para el diagnóstico de las crisis convulsivas (CC) son poco seguras. La utilidad de los ensayos de PRL sérica en el diagnóstico de crisis depende del diseño del estudio, el estándar de la clasificación de las crisis y los criterios de la elevación anormal en la PRL. La incertidumbre adicional es causada por fluctuaciones circadianas de la PRL sérica que muestran oleadas desde 50 hasta 100% antes de despertarse, aunque los niveles de PRL sérica tienden a ser estables durante la etapa de conciencia.<sup>4</sup> Las concentraciones de PRL normalmente son más altas en mujeres que en hombres,<sup>5</sup> así como en pacientes con epilepsia que en personas sanas.<sup>6</sup> En un estudio que midió la

From Stanford University, Palo Alto, CA.

Disclosure: The authors report no conflicts of interest.

Robert S. Fisher, MD, is supported by the Maslah Saul MD Chair, the Susan E. Horngren Fund, and the James and Carrie Anderson Epilepsy Research Fund.

This guideline was approved by the Therapeutics and Technology Assessment Subcommittee on November 19, 2004; by the Practice Committee on April 13, 2005; and by the Board of Directors on June 25, 2005.

Address correspondence and reprint requests to the American Academy of Neurology, 1080 Montreal Avenue, St. Paul, MN 55116.

The American Academy of Neurology Institute and its publisher thank the Mexican Academy of Neurology for translating this guideline.

línea basal de PRL cada 20 minutos durante 24 horas en 20 sujetos sanos como control y 17 personas con epilepsia,<sup>5</sup> la línea basal de PRL en mujeres no excedió los 700  $\mu\text{U/mL}$  y en hombres 400  $\mu\text{U/mL}$ . Sin embargo, los sujetos de estudio tuvieron trastornos del sueño y por tanto el efecto de las elevaciones nocturnas de PRL no pudieron establecerse por completo. Los eventos no epilépticos psicogénicos y psicológicos también pudieron influir en el nivel de PRL sérica. Varios estudios<sup>7-10</sup> han sugerido que la PRL sérica se incrementa después del síncope, un imitador común de epilepsia.

El interés reciente en el uso de PRL ha disminuido con la disponibilidad del monitoreo por videoelectroencefalograma (VEEG). Sin embargo, el marcador sérico sigue representando utilidad clínica potencial, en especial cuando el monitoreo por VEEG no es disponible fácilmente. Con base en el esquema de clasificación de evidencia de la Academia Americana de Neurología (AAN), sugerimos las recomendaciones para el uso de ensayo de PRL sérica para diferenciar CC de CPNE. También revisamos la utilidad de PRL sérica en otros ámbitos; por ejemplo, después de un síncope y crisis repetitivas y en la población de neonatos.

**Métodos.** Utilizamos los buscadores Medline, Science citation index y Cochrane database, combinando la búsqueda del término prolactina con los de crisis, pseudocrisis, epilepsia, síncope y estado epiléptico. Se identificaron 396 artículos hasta marzo de 2005. Revisamos los resúmenes de estos artículos, buscando estudios controlados que reportaran cambios de PRL después de crisis o eventos con características parecidas a las de una crisis. Se excluyeron revisiones sin fechas originales, cartas, resúmenes de reuniones, reportes y series de casos.

Examinamos 41 artículos completos junto con 5 artículos adicionales identificados después de revisar la bibliografía de las publicaciones encontradas. Se tradujeron tres artículos del alemán al inglés. Dividimos los artículos en dos: el grupo 1 abarcó estudios controlados que investigaron el uso de PRL posevento para discriminar entre CC y CPNE; el grupo 2 comprendió estudios controlados con valoración de los cambios de PRL sérica posterior al síncope, crisis repetitivas y crisis de neonatos. Del grupo 1 seleccionamos estudios basándonos en los siguientes criterios: 1. diseño prospectivo; 2. implementación del estándar de referencia mediante monitoreo continuo del EEG;

3. especificación del umbral para la elevación de PRL y el periodo de tiempo posevento de la medición de PRL; 4. reportes de las tasas de precisión del ensayo de PRL entre los casos y grupos control; 5. publicación en la revista revisada por colegas. En el grupo 2 se incluyeron estudios prospectivos de los cambios de PRL sérica después del síncope inducido por prueba de inclinación y monitoreo, crisis repetitivas, estado epiléptico (EE) y crisis en neonatos. Si un estudio reportaba más de un criterio de PRL elevada, analizamos los datos a partir del criterio más cercano al criterio común escogido por otros estudios del mismo grupo (doble del nivel de la línea basal,  $0 > 36 \text{ ng/mL}$  para el grupo 1). Las medidas de PRL presentadas en  $\mu\text{U/mL}$  o  $\mu\text{g/L}$  fueron convertidas en  $\text{ng/mL}$  para la consistencia de presentación. Cada estudio se evaluó utilizando el esquema de clasificación de evidencia de cuatro partes en el anexo 1.

La mayoría de laboratorios reportan los límites superiores normales de PRL entre 18 y 23  $\text{ng/mL}$ .<sup>11,18</sup> Sin embargo, las publicaciones anteriores no especifican el límite preciso y comúnmente aceptado del nivel de PRL como un indicador de epilepsia.<sup>12</sup> Aceptamos las opiniones individuales de los investigadores en cuanto a la elevación anormal de PRL. Cuando fue apropiado, calculamos sensibilidad y especificidad a partir de la proporción reportada de PRL elevada para cada tipo de crisis. El cálculo del intervalo de confianza de 95% (IC95%) para cada parámetro, se hizo empleando la puntuación de Wilson sin corrección de continuidad.<sup>13</sup> De todos los estudios de clase I y II, los valores de sensibilidad y especificidad fueron reunidos calculando su promedio ponderado. El teorema de Bayes se usó para los valores predictivos positivos (VPP) y negativos (VPN) del ensayo de PRL sérica y dependerían no sólo de los parámetros de sensibilidad y especificidad, sino también de la probabilidad preprueba de que el evento fuera epiléptico.<sup>11</sup> Calculamos los VP de las probabilidades preprueba de CC entre 99%–50%, asumiendo la sensibilidad respectiva reunida y la especificidad de CGTC, crisis parciales complejas (CPC) y todas las CC combinadas.

Establecimos el requisito de que el tamaño de la muestra de pacientes y el número de crisis debían ser 50 o más para que el estudio fuera considerado de “amplio espectro” para los propósitos de clasificación. Las variedades de tipos de crisis también fueron ponderados durante la valoración de la extensión de espectro de pacientes.

**Análisis de evidencia. Pregunta 1. ¿Es útil el ensayo de PRL sérica para diferenciar CC de CPNE?** Un estudio clase I y 9 estudios clase II compararon los cambios de PRL sérica después de la CC y la CPNE (tabla 1).<sup>14-23</sup> Todos los estudios, excepto uno,<sup>15</sup> atribuyeron etiologías psicogénicas a las CPNE. La terminología de

**Tabla 1** Estudios prospectivos controlados que investigan cambios en PRL después de CC o CPNE

| Referencia                     | Pacientes, n | Edad, años | Estándar de referencia                        | Periodo de medición de PRL           | Criterios para PRL elevada                          | Clase           |
|--------------------------------|--------------|------------|-----------------------------------------------|--------------------------------------|-----------------------------------------------------|-----------------|
| Willert et al. <sup>14</sup>   | 44           | 18-62      | VEEG                                          | 20 min*                              | >16.5 ng/mL (hombre)*<br>>23 ng/mL (mujer)          | II              |
| Shah et al. <sup>15</sup>      | 89           | NP         | VEEG                                          | Promedio 15-20 min                   | 2 X nivel de línea basal                            | II <sup>‡</sup> |
| Alving <sup>16</sup>           | 58           | 13-68      | Video y/o casete de EEG ambulatorio           | 15 min                               | 2 X nivel de línea basal dentro de 2 h posevento    | II <sup>§</sup> |
| Ehsan et al. <sup>17</sup>     | 50           | 6-61       | VEEG                                          | 15 min                               | 2 X nivel de línea basal dentro de 1 h posevento    | II <sup>¶</sup> |
| Fisher et al. <sup>18</sup>    | 20           | >18        | VEEG                                          | 10-20 min                            | >36 ng/mL                                           | II              |
| Rao et al. <sup>19</sup>       | 12           | 13-47      | VEEG                                          | Inmediatamente, luego c/15 min X 2 h | Por lo menos 2 X nivel de línea basal <sup>  </sup> | II              |
| Wroe et al. <sup>20</sup>      | 33           | 15-73      | VEEG                                          | 10 min                               | >45 ng/mL                                           | II              |
| Laxer et al. <sup>21</sup>     | 70           | 9-54       | VEEG                                          | <20 min                              | Función discriminante                               | I               |
| Pritchard et al. <sup>22</sup> | 12           | NP         | EEG continuo (± video)                        | 15 min                               | 2 X nivel de línea basal                            | II              |
| Oxley et al. <sup>23</sup>     | 18           | NP         | EEG continuo (grabadora medilog de 4 casetes) | <20 min                              | >36 ng/mL                                           | II              |

\*Los niveles de PRL sérica se midieron dentro de 10, 20, 30 y 60 min y 6, 12 y 24 horas posteriores al evento. Para coherencia de presentación, se analizaron los datos colectados a los 20 min posevento en esta revisión.

†Criterio límite más bajo para PRL anormal en los estudios de esta revisión.

‡Datos recolectados de modo prospectivo y analizados de manera retrospectiva. A pesar del amplio espectro de pacientes, bajamos la categoría del estudio a clase II debido al riesgo de parcialidad de expectativa.

§El diagnóstico corroborado por EEG reportó 17 de 20 crisis de pacientes no epilépticos (CPNE) [85%]; 12 participantes con CPNE tuvieron múltiples eventos estudiados, pero no se dispone de la proporción de los monitoreados. Un paciente fue excluido del análisis de validez a causa de ausencia del nivel de PRL en la línea basal. Bajamos la categoría del estudio a clase II dado el número poco claro de CPNE sin monitoreo.

¶La exactitud diagnóstica de niveles de PRL en sangre capilar medida por un ensayo modificado inmunorradiométrico.<sup>17</sup> Los valores de PRL sérica y sangre capilar correlacionaron con el coeficiente de Pearson de 0.92. Bajamos de categoría del estudio a clase II dado el riesgo adicional del error sistémico (parcialidad del instrumento) y la disponibilidad limitada del ensayo inmunorradiométrico.

||No fue especificado de manera explícita por el autor, fue basado en la interpretación de cifras en el artículo.

Periodo de tiempo de medida de PRL: tiempo desde el inicio de evento hasta la extracción de sangre para el ensayo de PRL. NP: no proporcionado. VEEG: Videoelectroencefalograma.

CPNE se utilizó en un estudio el cual no explicó en mayor detalle la etiología.<sup>15</sup> En un estudio clase I y en 7 estudios clase II, las medidas elevadas de PRL sérica fueron altamente predictivas de CGTC y CPC, mientras que la ausencia de elevación de PRL mostró poca distinción entre CC y CPNE.

Los datos no fueron suficientes para establecer el valor predictivo de la PRL después de las crisis sencillas parciales. Dos estudios de clase II<sup>14,16</sup> mostraron una pequeña pero significativa elevación de la PRL después de las CPNE; también reportaron la especificidad más baja en este grupo (74 y 66.7%). En un estudio la razón de la inconsistencia se encontró en el riesgo de error sistemático inherente que surge del estado incompleto de monitoreo de CPNE<sup>16</sup>; en el otro, fue un criterio menos riguroso para PRL anormal (ver tabla 1). Para incrementar la fuerza estadística, reunimos los datos disponibles de los estudios de clase I y II en el análisis promedio ponderado. Para el diagnóstico de CGTC y CPC la especificidad reunida varía entre 95.9 a 96.3%, mientras que la sensibilidad fue limitada a 46.1 a 60.0% (tabla 2).

Utilizando el teorema de Bayes, la tabla 3 muestra cómo el valor predictivo de la PRL depende de la probabilidad de CC en preprueba en la población

estudiada.<sup>11</sup> Si tomamos el valor de 95% de probabilidad de CC en preprueba en la población general de epilepsia, la medida positiva de PRL es altamente predictiva (99%) de CGTC o CPC; incluso con una probabilidad tan baja como 50%, la medida positiva de PRL seguirá siendo altamente predictiva de CGTC o CPC (VPP de aproximadamente 93%). En contraste, a causa de la sensibilidad relativamente baja de la prueba, una medida negativa de PRL no es predictiva de CPNE y por tanto no descarta el diagnóstico de CC.

Dos estudios clase II<sup>14,19</sup> examinaron el periodo de atenuación de la PRL después de una CC. En uno,<sup>19</sup> 6 pacientes con CC tuvieron atenuación de la concentración promedio de PRL de  $17.5 \pm 3.6\%$  del punto promedio más alto posictal 2 horas después de la crisis. Los niveles posictales de PRL de 2 horas fueron similares a la línea basal de PRL medida a la misma hora el día después de la crisis. En otro estudio,<sup>14</sup> 32 pacientes con CC experimentaron elevación posictal de PRL hasta después de 6 horas ( $p = 0.048$ ) comparado con el nivel de línea basal de PRL.

**Conclusiones.** Con base en un estudio de clase I y 7 estudios clase II, un nivel elevado de PRL, cuando se mide 10–20 minutos después del evento sospechado,

**Tabla 2** Medidas de validez del ensayo de PRL sérica para diferenciar entre CC y CPNE

| Referencia                     | Núm.† RPL/núm. crisis estudiados por tipo | Sensibilidad, % (IC95%)      | Especificidad, % (IC95%)      |
|--------------------------------|-------------------------------------------|------------------------------|-------------------------------|
| Willert et al. <sup>16</sup>   | Todos CC 28/32                            | 87.5 (71.9-95.0)             | 66.7 (39.1-86.2)              |
|                                | CPNE 4/12                                 | —                            | —                             |
| Shah et al. <sup>15</sup>      | CGTC 17/36                                | 47.2 (32.0-63.0)             | 98.2 (90.4-99.7)              |
|                                | CPC 19/56                                 | 33.9 (22.9-47.0)             | 98.2 (90.4-99.7)              |
|                                | CPS 3/27                                  | 11.1 (3.9-28.1)              | 98.2 (90.4-99.7)              |
|                                | CPNE 1/55                                 | —                            | —                             |
| Alving <sup>16</sup>           | CGTC?                                     | 93 (ND)                      | 74 (ND)                       |
|                                | CPC?                                      | 61 (ND)                      | 74 (ND)                       |
|                                | CPS?                                      | ?                            | ?                             |
|                                | CPNE 9/44                                 | —                            | —                             |
|                                | Todos CC?                                 | 69 (ND)                      | 74 (ND)                       |
| Ehsan et al. <sup>17</sup>     | CGTC 10/13                                | 76.9 (49.7-91.8)             | 85.7 (60.1-96.0)              |
|                                | CPC 15/17                                 | 88.2 (65.7-96.7)             | 85.7 (60.1-96.0)              |
|                                | CPS 0/6                                   | 0 (0-39.0)                   | 85.7 (60.1-96.0)              |
|                                | CPNE 2/14                                 | —                            | —                             |
| Fischer et al. <sup>18</sup>   | CGTC 5/9                                  | 55.6 (26.7-81.1)             | 100 (51.0-100)                |
|                                | CPC 1/7                                   | 14.3 (2.6-51.3)              | 100 (51.0-100)                |
|                                | CPNE 0/4                                  | —                            | —                             |
| Rao et al. <sup>19</sup>       | CGTC 2/2                                  | 100 (34.2-100)               | 100 (56.6-100)                |
|                                | CPC 3/4                                   | 75.0 (30.1-95.4)             | 100 (56.6-100)                |
|                                | CPNE 0/5                                  | —                            | —                             |
| Wroe et al. <sup>20</sup>      | CGTC 6/8                                  | 75.0 (40.9-92.9)             | 100 (72.3-100)                |
|                                | CPC 5/11                                  | 45.5 (21.3-72.0)             | 100 (72.3-100)                |
|                                | Ausencia 0/4                              | 0 (0-49.0)                   | 100 (72.3-100)                |
|                                | CPNE 1/18                                 | —                            | —                             |
| Laxer et al. <sup>21</sup>     | Todos CC 40/61                            | 65.6 (53.1-76.3)             | 94.4 (74.2-99.0)              |
|                                | CPNE 1/18                                 | —                            | —                             |
| Pritchard et al. <sup>22</sup> | CGTC 1/1                                  | 100 (20.7-100)               | 100 (61.0-100)                |
|                                | CPC 5/5                                   | 100 (56.6-100)               | 100 (61.0-100)                |
|                                | CPNE 0/6                                  | —                            | —                             |
| Oxley et al. <sup>2</sup>      | CGTC 4/6                                  | 66.7 (30.0-90.3)             | 90.0 (59.6-98.2)              |
|                                | CPC 0/4                                   | 0 (0-49.0)                   | 90.0 (59.6-98.2)              |
|                                | CPNE 1/10                                 | —                            | —                             |
|                                |                                           | Sensibilidad recolectada*, % | Especificidad recolectada*, % |
|                                | Todos CGTC†                               | 60.0 (48.9-71.1)             | 95.9 (91.4-100)               |
|                                | Todos CPC†                                | 46.1 (36.5-55.7)             | 96.3 (92.7-99.9)              |
|                                | Todos CC†                                 | 52.6 (47.0-58.2)             | 92.8 (89.9-95.7)              |

\*Sensibilidad recolectada calculada a partir del promedio ponderado de valores de sensibilidad de los estudios de clase I y clase II combinados. La especificidad se recolectó de manera similar.

†Se excluyen estudios de Willert et al.,<sup>14</sup> Alving et al.<sup>16</sup> y Laxer et al.<sup>21</sup> debido a que no proporcionaron datos.

‡Todas las CC incluyen datos de todos tipos reportados de crisis convulsivas (crisis generalizadas tónico clónicas [CGTC], crisis parciales complejas [CPC], crisis parciales simples [CPS] y ausencia de crisis) de todos los estudios, excepto del de Alving et al.<sup>16</sup>.

PRL: prolactina; CC: crisis epiléptica; CPNE: crisis psicogénica no epiléptica; ?: no proporcionado; ND: no pudo calcularse a partir de los datos disponibles.

**Tabla 3** Valores predictivos del ensayo de PRL sérica en relación con la prevalencia de CPNE

| Probabilidad de CC en preprueba* %                                                                                    | VPP del ensayo de PRL sérica, % | VPN del ensayo de PRL sérica, % |
|-----------------------------------------------------------------------------------------------------------------------|---------------------------------|---------------------------------|
| Para las crisis generalizadas tónico-clónicas <sup>†</sup> , asumiendo especificidad de 95.9% y sensibilidad de 60.0% |                                 |                                 |
| 99                                                                                                                    | 99.9                            | 2.4                             |
| 95                                                                                                                    | 99.6                            | 11.2                            |
| 90                                                                                                                    | 99.3                            | 21.0                            |
| 75                                                                                                                    | 97.8                            | 44.4                            |
| 50                                                                                                                    | 93.6                            | 70.6                            |
| Solamente para las CPC <sup>†</sup> , asumiendo la especificidad de 96.3% y sensibilidad de 46.1%                     |                                 |                                 |
| 99                                                                                                                    | 99.9                            | 1.8                             |
| 95                                                                                                                    | 99.6                            | 8.6                             |
| 90                                                                                                                    | 99.1                            | 16.6                            |
| 75                                                                                                                    | 97.4                            | 37.3                            |
| 50                                                                                                                    | 92.6                            | 64.1                            |

\*La probabilidad de pre-prueba de que el evento sea epiléptico.

<sup>†</sup>Datos no disponibles de los estudios de Willert et al.,<sup>14</sup> Alving et al.<sup>16</sup> y Laxer et al.<sup>21</sup>.

PRL: prolactina; CPNE: crisis psicogénica no epilépticas; CC: crisis convulsivas; VPP: valor positivo predictivo; VPN: valor predictivo negativo.

probablemente es apoyo útil para diferenciar entre CGTC o CPC y CPNE en adultos o niños mayores. Con base en los estudios consistentes clase I y II, el ensayo de PRL sérica normal por sí solo no es suficiente para hacer un diagnóstico de CPNE o para excluir la posibilidad de CGTC o CPC por su baja sensibilidad y VPN. Con base en dos estudios clase II, la PRL sérica, cuando se mide después de más de 6 horas de una CC, probablemente es representativa del nivel de PRL de la línea basal.

**Pregunta 2. ¿Cambian las medidas de PRL sérica debido a otros problemas neurológicos?** *Síncope.* Dos estudios clase II investigaron los cambios de PRL sérica durante la prueba de inclinación en posición vertical de 60° en sujetos con riesgo de síncope (tabla 4). En un estudio

de pacientes con edad promedio de 70 años,<sup>7</sup> 11 de ellos con síncope mostraron un nivel promedio elevado de PRL de 44 ng/mL (IC95% 27–61) cuando fueron examinados dentro de 5 minutos después del síncope, comparado con el nivel de línea basal de PRL de 10 ng/mL (IC95% 7–14); 10 pacientes sin síncope no mostraron cambios significativos de PRL después de la prueba de inclinación en posición vertical. En otro estudio de individuos más jóvenes (promedio 30–40 años),<sup>8</sup> 14 con síncope mostraron un nivel promedio de PRL de 18.1 ng/mL 5–10 minutos después del síncope. Este nivel fue dos veces más alto que el basal (7.7 ng/mL). Este incremento relativo fue significativo comparado con la línea basal que no mostró cambios relativos y las medidas promedio de PRL posevento en 22 pacientes sin síncope ( $p < 0.004$ ). El nivel promedio de PRL de 18.1 ng/mL es alto, pero no claramente anormal. Las razones de la diferencia del tamaño del efecto no fueron evidentes y pueden reflejar diferencias en edad y ensayo de PRL entre los dos estudios.

**Conclusión.** De acuerdo con estudios limitados clase II, la PRL sérica posiblemente incrementa el nivel de la línea basal cuando se mide 10 minutos después del síncope, en adultos. El nivel elevado de PRL no puede utilizarse para diferenciar entre crisis y síncope.

**Crisis repetitivas.** Un estudio de clase II<sup>24</sup> midió el nivel de PRL sérica 20 minutos después del monitoreo de estado epiléptico (EE) en 15 pacientes (tabla 5). Todas las medidas de PRL después del EE fueron normales; de hecho, en la mayoría de los pacientes fueron más bajas que las de la línea basal. Dos estudios clase II investigaron de modo prospectivo las medidas de PRL sérica poscrisis repetitivas, discretas (no EE), utilizando el monitoreo por VEEG como estándar de referencia (ver tabla 5).<sup>25,26</sup> El incremento de PRL posictal fue reducido cuando las crisis ocurrían después de intervalos cortos, sin crisis, < 25 horas, comparado con aquellos que ocurrían después de intervalos sin crisis más prolongados.<sup>25</sup> En contraste, otro estudio<sup>26</sup> mostró que las siguientes crisis

**Tabla 4** Características metodológicas de los estudios que evalúan los cambios en PRL sérica después del síncope inducido de inclinación

| Referencia                      | Pacientes con síncope (edad, promedio, años) | Estándar de referencia                                                                | Periodo de medida de PRL | Criterio de PRL elevada | PRL postsíncope, ng/mL | Línea basal de PRL en pacientes con síncope, ng/mL | Clase |
|---------------------------------|----------------------------------------------|---------------------------------------------------------------------------------------|--------------------------|-------------------------|------------------------|----------------------------------------------------|-------|
| Oribe et al. <sup>7</sup>       | 11 (70)                                      | Decremento documentado de PS y síntomas de síncope inducido por prueba de inclinación | <5 min                   | 19 ng/mL                | 44 (IC95% 27–61)*      | 10 (IC95% 7–14)*                                   | II    |
| Theodorakis et al. <sup>8</sup> | 14 (30–40)                                   | Síntomas de síncope inducido por prueba de inclinación                                | 5–10 min                 | NE                      | 18.1*                  | 7.7*                                               | II    |

\*En 21 pacientes estudiados, la inclinación vertical provocó hipotensión con síncope en 11 pacientes. Para los 10 pacientes sin síncope, el nivel promedio de PRL posprueba de inclinación fue de 8 ng/mL (IC95% 6–10), comparado con el nivel promedio de la línea basal de 7 ng/mL (IC95% 5–8).

<sup>†</sup>14 pacientes mostraron síntomas de síncope. El incremento en el nivel promedio de PRL posprueba de inclinación sincopal relativo al nivel promedio de la línea basal fue significativo comparado con las medidas promedio en 22 pacientes sin síncope ( $p < 0.004$ ).

PS: presión sanguínea medida a través de esfigmomanómetro automático; NE: no especificado.

**Tabla 5** Características metodológicas de los estudios que evalúan los cambios en PRL sérica después de EE o crisis repetitivas (no EE)

| Referencia                     | Pacientes, n (edad, años) | Estándar de referencia    | Periodo de medida de PRL              | Criterio para PRL elevada                        | PRL posictal         | Clase |
|--------------------------------|---------------------------|---------------------------|---------------------------------------|--------------------------------------------------|----------------------|-------|
| Tomson et al. <sup>24</sup>    | 15 (31-79)                | Grabación de EEG ictal    | <20 min después de finalización de EE | >25 ng/mL                                        | 0/15*                | II    |
| Malkowicz et al. <sup>25</sup> | 8 (12-44)                 | Grabación de video de EEG | 15 min después                        | >3 X nivel de línea basal                        | 1.015 (ISC) + 33.58* | II    |
| Bauer et al. <sup>26</sup>     | 14 (16-43)                | Grabación de video de EEG | En los intervalos de 5, 30 y 120 min  | >32 ng/mL para mujeres y > 23 ng/mL para hombres | 5/14†                | II    |

\*De los 15 pacientes con estado epiléptico (EE) ninguno demostró elevación posictal de PRL.

†La ecuación de regresión para predecir el nivel posictal de PRL después de 15 minutos como función de intervalo sin crisis (ISC), con el coeficiente de Pearson: 0.89. Esto indica el valor bajo posictal de PRL después de 15 minutos para crisis con ISC corto.

‡5 de 14 pacientes mostraron incremento significativo de PRL después de la primera crisis y cada crisis posterior (ISC promedio: 5 horas y 4 min).

repetitivas (intervalos promedio de 3 horas a 32 minutos entre ellos), las medidas posictales de PRL fueron considerable y sistemáticamente incrementadas en 5 de 14 pacientes observados, sin tomar en cuenta el tiempo de intervalo entre crisis. Ninguno de los 14 pacientes mostró decremento en las medidas posictales de PRL. Las razones de la inconsistencia en los datos no son claras, aunque los tamaños de las muestras fueron pequeños en ambos estudios, reflejando un poder estadístico bajo.

**Conclusiones.** Con base en los estudios inconsistentes, no se puede establecer conclusión alguna en cuanto a los cambios de PRL sérica al finalizar el EE. Con base en los estudios clase II contradictorios, tampoco no se puede establecer una conclusión en cuanto a los cambios en la PRL sérica poscrisis repetitivas (no EE).

**Población neonatal.** Dos estudios clase II evaluaron prospectivamente los cambios en la PRL sérica después de crisis corroboradas con EEG entre neonatos<sup>27,28</sup> (tabla 6). En un estudio,<sup>27</sup> neonatos con crisis electrográficas mostraron una proporción media elevada del valor posictal de PRL (2.71) sobre el de la línea basal. Este cambio fue significativo en comparación con los valores de PRL en neonatos que experimentaron eventos sin EEG correlacionado ( $p = 0.037$ ). Las proporciones de PRL posictales y de línea basal >2 mostraron sensibilidad de 45% y especificidad de 100% en diagnosticar crisis corroboradas con EEG. Pacientes con

proporciones posictales elevadas de PRL tuvieron crisis evidentes centrales tónicas, mientras que 2 pacientes con crisis subclínicas no mostraron elevación de PRL. Otro estudio<sup>28</sup> mostró que en 6 pacientes con crisis electrográficas los valores posictales de PRL a los 15 y 30 minutos no fueron estadísticamente diferentes, en comparación con los valores de la línea basal. Sin embargo, 5 de 6 pacientes en este estudio sólo tuvieron crisis subclínicas, y todos los pacientes ictales presentaron anomalías moderadas o graves en el EEG de fondo. La encefalopatía neonatal puede estar asociada con PRL elevada en la línea basal,<sup>28</sup> así como con el no aumento de PRL posictal, comparado con el nivel basal.<sup>27</sup> La divergencia de los datos podría explicarse por las diferencias sistemáticas en los pacientes.

**Conclusión.** Con base en los estudios contradictorios de clase II, no se pueden establecer conclusiones en cuanto a los cambios de PRL sérica después de CC en neonatos.

**Discusión.** Utilizando el incremento relativo o absoluto de PRL como el criterio de anomalía, los datos reunidos sugieren que la PRL sérica elevada es específica para diferenciar CPC y CGTC de CPNE. La utilidad clínica de la PRL sérica incrementa el VPP alto del ensayo para CC. En el ámbito clínico, cuando se sospecha que los eventos parecidos a CGTC y CPC son CPNE y donde imitadores “orgánicos”, como el

**Tabla 6** Características metodológicas de los estudios que evalúan los cambios de PRL sérica después de crisis en neonatos

| Referencia                   | Pacientes, n | EG, sem/ EPN, días | Estándar de referencia | Periodo de medida de PRL | Criterio para PRL elevada | Con crisis                                                              | Sin crisis                               | Clase |
|------------------------------|--------------|--------------------|------------------------|--------------------------|---------------------------|-------------------------------------------------------------------------|------------------------------------------|-------|
| Morales et al. <sup>27</sup> | 19           | 39.2/10.5          | EEG de 2 h             | 30 min                   | >2 X línea basal          | 5/11*                                                                   | 0/8*                                     | II    |
| Legido et al. <sup>28</sup>  | 28           | 38.4/3.9           | EEG de 40 min          | 15 y 30 min              | NE                        | PRL posictal promedio: 175 ng/mL* a los 15 min, 188 ng/mL* a los 30 min | PRL promedio: 114 ng/mL al final del EEG | II    |

\*Incremento de PRL posictal >2 X valor de línea basal en 5 de 11 pacientes con crisis de EEG (proporción de PRL promedio: 2.71) y en 0 de 8 pacientes sin crisis de EEG (proporción de PRL promedio: 1.26). Las proporciones de PRL fueron significativamente más altas en el grupo de crisis ( $p = 0.037$ ). Este criterio diagnosticó las crisis en neonatos con sensibilidad de 45% y especificidad de 100%. De los 11 pacientes con crisis de EEG, 2 tuvieron crisis subclínicas.

†No significativo comparado con el valor promedio de línea basal de PRL (170 ng/mL) del grupo de crisis. EG sem edad de gestación en semanas; EPN: edad posnatal; NE: no especificado.

síncope han sido excluidos, la PRL sérica elevada apoya la etiología epiléptica. Por tanto, la prueba positiva puede ser clínicamente útil, en especial en el ámbito hospitalario, donde el monitoreo por VEEG no está disponible fácilmente.

Es importante reconocer algunas limitaciones del ensayo de PRL. Los datos no fueron suficientes para establecer el valor predictivo de la PRL después de tipos de crisis que no incluyen CGTC y CPC. Una baja sensibilidad del ensayo implica que el resultado negativo de la prueba tiene poco valor en el diagnóstico de eventos no epilépticos. Además, es común que las CPNE imiten crisis repetitivas o EE, aunque los datos que apoyan el uso de PRL en este ámbito no son concluyentes. Eventos epilépticos y no epilépticos pueden coexistir en el mismo paciente. La PRL sérica sólo ayuda en el diagnóstico de eventos individuales y no en epilepsia. La PRL se puede incrementar después del síncope. Tampoco se sabe si la PRL aumenta después de migrañas, accidentes isquémicos transitorios, arritmias cardíacas y otros imitadores orgánicos de epilepsia. Las medidas pareadas de línea basal y PRL posictal pueden ayudar a discriminar entre las condiciones asociadas con hiperprolactinemia, como el embarazo, la lactancia, prolactinomas, hipotiroidismo primario, fármacos (p. ej. fenotiazina, bromocriptina) y algunas otras. Si no se excluyen estas condiciones, se puede esperar una reducción en la especificidad del ensayo de PRL para la identificación correcta de CC.

La sensibilidad y especificidad de la prueba diagnóstica es una función de los criterios seleccionados de anormalidad. Siempre existe un compromiso entre sensibilidad y especificidad dependiendo del punto de límite escogido, que se manifiesta en la curva característica recipiente operador (ROC). Ciertas discrepancias entre los estudios revisados pueden ser relacionadas con las diferencias en el punto límite escogido. Debido a la falta de criterios estandarizados de la medida “anormal” de PRL, no se sabe si los criterios escogidos por los estudios reflejan el compromiso ideal entre sensibilidad y especificidad. Esta incertidumbre representa una limitación clave de la evidencia actual, especialmente tomando en cuenta la especificidad alta discrepante y la sensibilidad baja del ensayo de PRL utilizado para diagnosticar crisis. Sin embargo, la alta especificidad en la prueba de exploración asegura una tasa baja de falsos positivos.

Los estudios revisados sugieren que el muestreo de PRL sérica debe llevarse a cabo dentro de 10 o 20 minutos después del evento. Este marco de tiempo genera problemas significativos logísticos cuando la prueba se usa fuera del hospital. Se pueden desarrollar métodos para la adquisición de muestras de PRL en casa,<sup>18</sup> llevando a cabo las pruebas posteriormente en laboratorios equipados.

**Recomendaciones prácticas: para los clínicos que consideran la prueba sanguínea en laboratorio para diagnosticar CC:**

1. La PRL sérica elevada, cuando se mide en el ámbito clínico apropiado de 10 a 20 minutos después del evento sospechado, debe considerarse como un apoyo útil para diferenciar CGTC y CPC de CPNE entre adultos y niños mayores (nivel B).
2. La PRL sérica, cuando se mide después de más de 6 horas del evento sospechado debe ser representativa del nivel de la línea basal de PRL (nivel B).
3. El ensayo de PRL sérica no es útil para distinguir entre crisis y síncope (nivel B).
4. La utilidad del ensayo de PRL sérica no ha sido establecida en la evaluación de EE, crisis repetitivas o crisis neonatales (nivel U).

**Recomendaciones para investigaciones futuras. Estandarización de la elevación “anormal” de PRL.** Un estudio de una muestra grande, pareado por género, de los valores de la línea basal de PRL en sujetos sanos y epilépticos, tomando en cuenta el sueño ininterrumpido, puede dar una estandarización más exacta de los valores de umbral de PRL relacionada con el sexo. Ya que los parámetros de sensibilidad y especificidad dependen de los puntos límite escogidos, el uso de la curva ROC puede permitir la elección del compromiso apropiado entre sensibilidad y especificidad.

**Ensayos de PRL capilares.** Un ensayo de PRL capilar, utilizando la metodología de punción de dedo puede ser tan exacto como los ensayos de PRL venosa para diferenciar CC de CPNE.<sup>17,18</sup> Estudios futuros que investigan la utilidad del equipo de PRL del paciente externo, para documentar los cambios de PRL capilar, dentro de un corto tiempo después del evento pueden superar las limitaciones prácticas actuales.

**PRL en otros tipos de eventos orgánicos no epilépticos.** Con la excepción del síncope, se sabe poco acerca de los cambios de PRL sérica después de otros imitadores de crisis que pueden afectar el eje hipotalámico-hipofisario. Tales imitadores orgánicos incluyen migrañas, ataques isquémicos transitorios, arritmias cardíacas, amnesia global transitoria y otros. Se necesitan más estudios para definir la especificidad del ensayo de PRL en el ámbito de estos eventos.

**Población pediátrica.** Revisamos varios estudios clase II que incluyeron niños >6 años de edad.<sup>16,17,19–21</sup> No encontramos estudios controlados, prospectivos que estudiaran bebés o niños más jóvenes, empleando monitoreo por VEEG. La utilización del ensayo de PRL sérica en neonatos presenta problemas adicionales no evidentes en adultos. La concentración de PRL sérica en neonatos depende mucho de la edad de gestación<sup>29</sup> y la edad posnatal,<sup>30</sup> y puede ser influenciada por la encefalopatía coexistente.<sup>28</sup> Además, muchas crisis electrográficas en neonatos pueden estar

clínicamente ocultas,<sup>31</sup> y algunas crisis clínicas no muestran correlación electrográfica.<sup>32</sup> Se necesitan más estudios prospectivos de las medidas posictales de PRL en neonatos y niños.

**PRL en otros problemas epilépticos.** Se requieren más datos para interpretar el valor de la PRL después de un EE y crisis repetitivas.

## RENUNCIA DE RESPONSABILIDAD LEGAL

Esta evaluación se enfoca en el uso del ensayo de PRL sérica en el diagnóstico de CC. La utilidad de ensayo de PRL sérica se encuentra fuera del alcance de esta revisión. Esta declaración se proporciona como un servicio educacional de la AAN. Se basa en la evaluación de la información científica y clínica actual. No se pretende incluir todos los métodos de cuidado apropiados posibles para el problema particular neurológico o todos los criterios legítimos para escoger el procedimiento específico. Tampoco se pretende excluir algunas metodologías alternativas razonables. La AAN reconoce que las decisiones acerca del cuidado de un paciente específico son la prerrogativa del paciente y el médico responsable del paciente, y se basan en todas las circunstancias involucradas.

## RECONOCIMIENTO

Los autores agradecen a los miembros del subcomité de evaluación terapéutica y tecnológica por la valiosa orientación a lo largo de la redacción preliminar de este proyecto. También agradecen a Farhad Sahebkar-Moghaddam, MD, por la traducción al inglés de los artículos en alemán.

## ANEXO 1

### Clasificación de evidencia

**Clase I.** Evidencia proporcionada por un estudio prospectivo en un amplio espectro de personas con la condición sospechada, que utiliza el estándar de referencia ("oro") para la definición del caso, donde la prueba se aplica en la evaluación ciega y permite la evaluación de las pruebas apropiadas para la exactitud diagnóstica. Todos los pacientes que pasaron por la prueba diagnóstica tienen la presencia o ausencia de la enfermedad determinada.

**Clase II.** Evidencia proporcionada por un estudio prospectivo en un limitado espectro de personas con la condición sospechada, o un estudio bien diseñado retrospectivo en un amplio espectro de participantes con la condición establecida (por el estándar de "oro") comparado con un amplio espectro de sujetos de control, donde la prueba se aplica en la evaluación ciega y permite la evaluación de las pruebas apropiadas de la exactitud diagnóstica.

**Clase III.** Evidencia proporcionada por un estudio retrospectivo, donde las personas con la condición establecida o sujetos de control son de un limitado espectro, y el estándar de referencia, si no es objetivo, se aplica por alguien que no sea la persona que llevó a cabo la prueba.

**Clase IV.** Cualquier diseño donde la prueba no se aplica en la evaluación independiente o evidencia proporcionada por solamente una opinión experta o en una serie descriptiva de casos (sin sujetos de control).

## ANEXO 2

### Clasificación de recomendaciones

A: establecido como efectivo, no efectivo o dañino para la condición dada en la población específica. (Nivel A requiere por lo menos dos estudios consistentes de clase I.)

B: probablemente efectivo, no efectivo o dañino para la condición dada en la población específica. (Nivel B requiere por lo menos un estudio de clase I o dos estudios consistentes de clase II.)

C: posiblemente efectivo, no efectivo o dañino para la condición dada en la población específica. (Nivel C requiere por lo menos un estudio de clase II o dos estudios consistentes de clase III.)

U: datos inadecuados o contradictorios dado el conocimiento actual, el tratamiento no está comprobado.

## ANEXO 3

Miembros del subcomité de evaluación terapéutica y tecnológica: Douglas S. Goodin, MD (presidente); Yuen T. So, MD, PhD (vicepresidente);

Carmel Armon, MD, MHS; Richard M. Dubinsky, MD, MPH; Mark Hallett, MD; David Hammond, MD; Cynthia Harden, MD; Chung Hsu, MD, PhD; Andres M. Kanner, MD; David S. Lefkowitz, MD; Janis Miyasaki, MD; Michael A. Sloan, MD, MS; y James C. Stevens, MD.

Received January 6, 2005. Accepted in final form July 5, 2005.

## REFERENCIAS

1. Frantz AG. Prolactin. *N Engl J Med* 1978;298:201-207.
2. Parra A, Velasco M, Cervantes C, Munoz H, Cerborn MA, Velasco F. Plasma prolactin increase following electrical stimulation of the amygdala in humans. *Neuroendocrinology* 1980;31:60-65.
3. Trimble MR. Serum prolactin in epilepsy and hysteria. *BMJ* 1978;2:1682.
4. Cavallo A, Moore DC, Nahori A, Beaumanoir A, Sizonenko PC. Plasma prolactin and cortisol concentrations in epileptic patients during the night. *Arch Neurol* 1984;41:1179-1182.
5. Bauer J, Stefan H, Schrell U, Uhlig B, Landgraf S, Neubauer U, Neundorfer B, Burr W. Serum prolactin concentrations and epilepsy: a study which compares healthy subjects with a group of patients in presurgical evaluation and circadian variations with those related to seizures. *Eur Arch Psychiatry Clin Neurosci* 1992;241:365-371.
6. Molaie M, Culebras A, Miller M. Nocturnal plasma prolactin and cortisol levels in epileptics with complex partial seizures and primary generalized seizures. *Arch Neurol* 1987;44:699-702.
7. Oribe E, Amini R, Nissenbaum E, Boal B. Serum prolactin concentrations are elevated after syncope. *Neurology* 1996;47:60-62.
8. Theodorakis GN, Markianos M, Livanis EG, Zarvalis E, Flevari P, Kremastinos DT. Hormonal responses during tilt-table test in neurally mediated syncope. *Am J Cardiol* 1997;79:1692-1695.
9. Cordingley G, Brown D, Dane P, Harnish K, Cadamagnani P, O'Hare T. Increases in serum prolactin levels associated with syncopal attacks. *Am J Emerg Med* 1993;11:251-252.
10. Lusic I, Pintaric I, Hozo I, Boic L, Capkun V. Serum prolactin levels after seizure and syncopal attacks. *Seizure* 1999;8:218-222.
11. Yerby MS, van Belle G, Friel PN, Wilensky AJ. Serum prolactins in the diagnosis of epilepsy: sensitivity, specificity, and predictive value. *Neurology* 1987;37:1224-1226.
12. Bauer J. Epilepsy and prolactin in adults: a clinical review. *Epilepsy Res* 1996;24:1-7.
13. Newcombe RG. Two-sided confidence intervals for the single proportion: comparison of seven methods. *Stat Med* 1998;17:857-872.
14. Willert C, Spitzer C, Kusserow S, Runge U. Serum neuron-specific enolase, prolactin, and creatine kinase after epileptic and psychogenic non-epileptic seizures. *Acta Neurol Scand* 2004;109:318-323.
15. Shah AK, Shein N, Fuerst D, Yangala R, Shah J, Watson C. Peripheral WBC count and serum prolactin level in various seizure types and nonepileptic events. *Epilepsia* 2001;42:1472-1475.
16. Alving J. Serum prolactin levels are elevated also after pseudo-epileptic seizures. *Seizure* 1998;7:85-89.
17. Ehsan T, Fisher RS, Johns D, Lukas R, Blum D, Eskola J. Sensitivity and specificity of paired capillary

- measurement in diagnosis of seizures. *J Epilepsy* 1996;9: 101–105.
18. Fisher RS, Chan DW, Bare M, Lesser RP. Capillary prolactin measurement for diagnosis of seizures. *Ann Neurol* 1991;29:187–190.
19. Rao ML, Stefan H, Bauer J. Epileptic but not psychogenic seizures are accompanied by simultaneous elevation of serum pituitary hormones and cortisol levels. *Neuroendocrinology* 1989;49:33–39.
20. Wroe SJ, Henley R, John R, Richens A. The clinical value of serum prolactin measurement in the differential diagnosis of complex partial seizures. *Epilepsy Res* 1989;3: 248–252.
21. Laxer KD, Mullooly JP, Howell B. Prolactin changes after seizures classified by EEG monitoring. *Neurology* 1985; 35:31–35.
22. Pritchard PB, Wannamaker BB, Sagel J, Daniel CM. Serum prolactin and cortisol levels in evaluation of pseudoepileptic seizures. *Ann Neurol* 1985;18:87–89.
23. Oxley J, Roberts M, Dana-Haeri J, Trimble M. Evaluation of prolonged 4-channel EEG-taped recordings and serum prolactin levels in the diagnosis of epileptic and nonepileptic seizures. In: Dam M, Gram L, Penry JK, eds. *Advances in epileptology: XIIth Epilepsy International Symposium*. New York: Raven Press, 1981: 343–355.
24. Tomson T, Lindbom U, Nilsson B, Svanborg E, Andersson DE. Serum prolactin during status epilepticus. *J Neurol Neurosurg Psychiatry* 1989;52:1435–1437.
25. Malkowicz DE, Legido A, Jackel RA, Sussman NM, Eskin BA, Harner RN. Prolactin secretion following repetitive seizures. *Neurology* 1995;45:448–452.
26. Bauer J, Kaufmann P, Klingmuller D, Elger CE. Serum prolactin response to repetitive epileptic seizures. *J Neurol* 1994;241:242–245.
27. Morales A, Bass NE, Verhulst SJ. Serum prolactin levels and neonatal seizures. *Epilepsia* 1995;36:349–354.
28. Legido A, Lago P, Chung HJ, Sperling M, Clancy RR. Serum prolactin in neonates with seizures. *Epilepsia* 1995; 36:682–686.
29. Schober E, Simbruner G, Salzer H, Husslein P, Spona J. The relationship of prolactin in cord blood, gestational age and respiratory compliance after birth in newborn infants. *J Perinat Med* 1982;10:23–26.
30. Tapanainen J. Hormonal changes during the perinatal period: serum testosterone, some of its precursors, and FSH and prolactin in preterm and fullterm male infant cord blood and during the first week of life. *J Steroid Biochem* 1983;18:13–18.
31. Clancy RR, Legido A, Lewis D. Occult neonatal seizures. *Epilepsia* 1988;29:256–261.
32. Mizrahi EM. Neonatal seizures: problems in diagnosis and classification. *Epilepsia* 1987;28(Suppl 1):S46–S55.
